# Supplementary material for: Dermoscopy practice guidelines for use in telemedicine
Source: PubMed Central journal article supplement (PMC9046409; doi:10.1038/s41746-022-00587-9), 2022-04-27
Supplement: 41746_2022_587_MOESM1_ESM.pdf [file 41746_2022_587_MOESM1_ESM.pdf]

**Supplemental Table 1:** Comprehensive list of dermatoscopes.

| <b>Dermatoscopes</b>                                                                                                                                                                      |                                                                      |                                                                                                                                 |                                                                                                 |                                  |                |                           |
|-------------------------------------------------------------------------------------------------------------------------------------------------------------------------------------------|----------------------------------------------------------------------|---------------------------------------------------------------------------------------------------------------------------------|-------------------------------------------------------------------------------------------------|----------------------------------|----------------|---------------------------|
| <i>Customized for Smartphone Attachment</i>                                                                                                                                               |                                                                      |                                                                                                                                 |                                                                                                 |                                  |                |                           |
| <i>3Gen: DermLite</i>                                                                                                                                                                     | <i>Heine Optotechnik</i>                                             | <i>Canfield Scientific</i>                                                                                                      | <i>FotoFinder</i>                                                                               | <i>MoleScope</i>                 |                |                           |
| DL1<br>DL1 Basic<br>DL HÜD<br>Foto X<br>HandyScope<br>(DermLite/FotoFinder)                                                                                                               | ic1                                                                  | VEOS DS3                                                                                                                        | Handyscope<br>Classic<br><br>HandyScope<br>(Dermlite/Foto<br>Finder)                            | MoleScope                        |                |                           |
| <i>Independent Devices</i>                                                                                                                                                                |                                                                      |                                                                                                                                 |                                                                                                 |                                  |                |                           |
| <i>3Gen:<br/>DermLite</i>                                                                                                                                                                 | <i>Heine<br/>Optotechnik</i>                                         | <i>Canfield<br/>Scientific</i>                                                                                                  | <i>DermoScan</i>                                                                                | <i>Luxamed</i>                   | <i>Reister</i> | <i>KaWe</i>               |
| DL100<br>DL1<br>DL200<br>DL200<br>Hybrid<br>DL200 HR<br>DL3<br>DL3N<br>DL4<br>DL4W<br>DL GL<br>DL Carbon<br>DLII Pro<br>DERMLITE<br>FOTO X &<br>NAILIO<br>Lumio®<br>Lumio® UV<br>Lumio® S | DELTA 20T<br>DELTA 30<br>DELTAone<br>Mini3000<br>Mini3000 LED<br>NC2 | microDERM Luminis<br>(VISIONED)<br><br>MicroDERM Optima<br>(VISIONED)<br><br>MicroDERM<br>D200EVO<br>(VISIONED)<br><br>VEOS HD2 | DermoGenius 3<br><br>DermoGenius Ultra<br><br>Illuco IDS-1100<br><br>Illuco IDS-3100<br>Magnum+ | Luxascope 3.7V<br>Luxascope 2.5V | Ri-Derma 3.5V  | Piccolight D<br>Eurolight |

**Supplemental Table 2:** Comprehensive list of digital camera dermoscopy.

| <b>Digital Camera Dermoscopy</b>                                               |                     |                                |                                                                                                                                          |                                                  |                                                  |
|--------------------------------------------------------------------------------|---------------------|--------------------------------|------------------------------------------------------------------------------------------------------------------------------------------|--------------------------------------------------|--------------------------------------------------|
| <i>3Gen:<br/>DermLite</i>                                                      | <i>Caliber I.D.</i> | <i>Canfield<br/>Scientific</i> | <i>Derma Medical</i>                                                                                                                     | <i>Fotofinder</i>                                | <i>Visiomed</i>                                  |
| DL Cam<br>DL Foto X<br>DL Foto X Plus<br>DL Foto II Pro<br>DL Foto II Pro Plus | VivaCam             | VEOS SLR                       | MoleMax HD<br>MoleMax HD Pro<br>MoleMax HD Modular<br>MoleMax HD AMTBM<br>MoleMax 360<br>DermDOC HR<br>SkinDOC<br>PhotoMax PRO DLF IIcro | ATBM Master<br>Vexia<br>Medicam 1000<br>Leviacam | microDERM D120<br>microDERM E30<br>microDERM F80 |

**Supplemental Figure 1:** Example of low-quality versus high-quality image acquisition. Images should be cephalically oriented with consistent non-variable position of the lesion of interest for clinical and dermoscopic images.

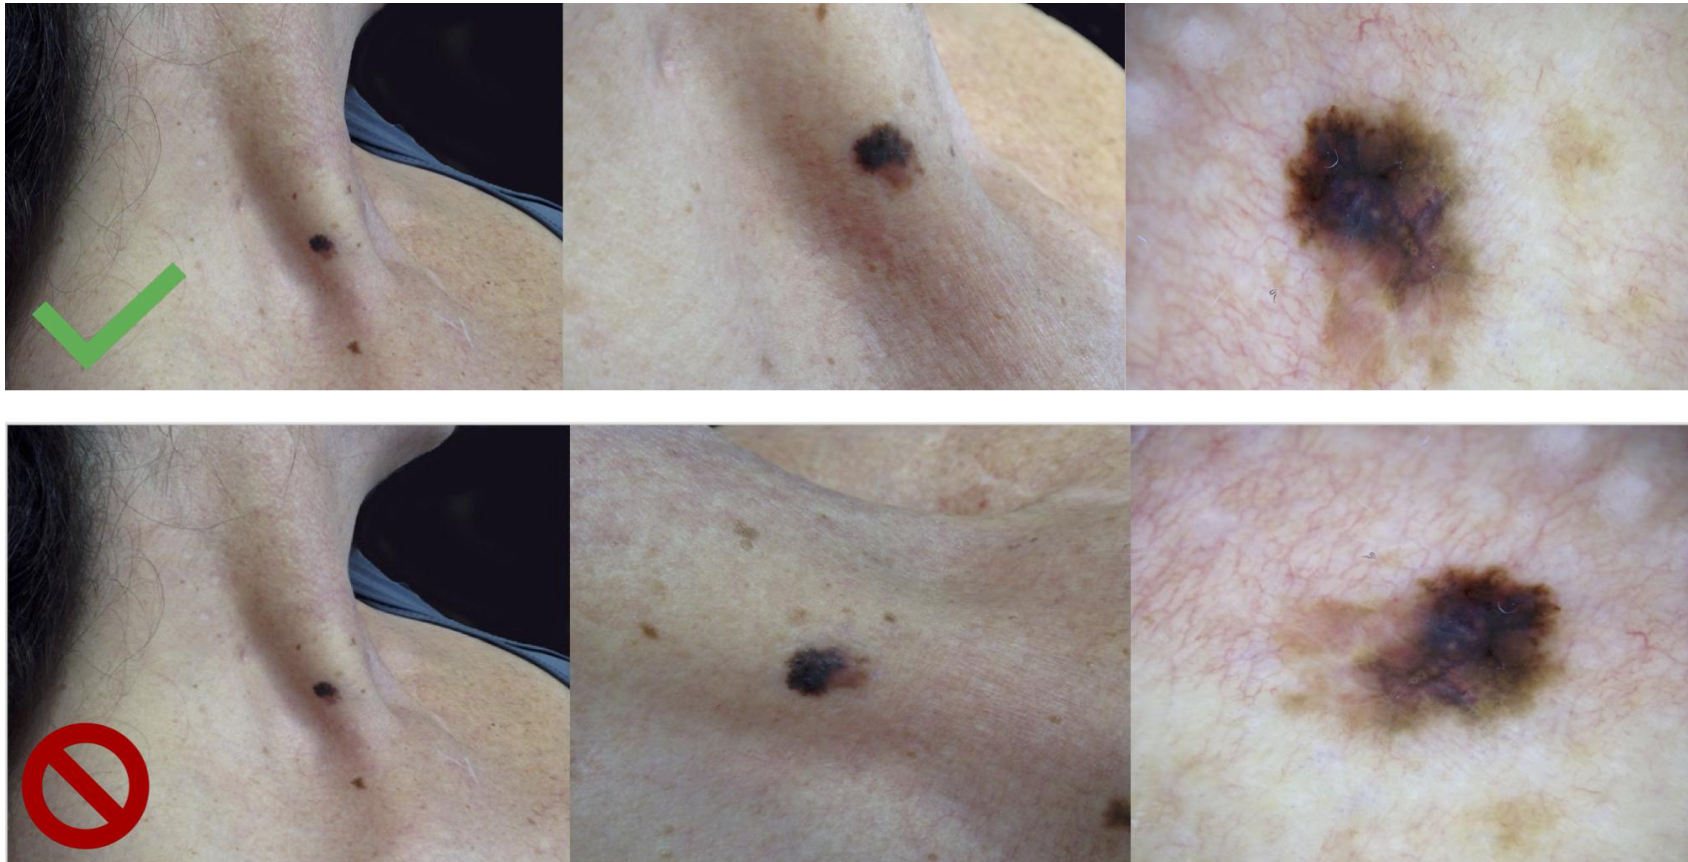

Images courtesy of Clara N. Curiel-Lewandrowski, MD and Delaney B. Stratton, DNP, PhD, University of Arizona / Banner Dermatology Division. These images were developed as part of the International Skin Imaging Collaboration (ISIC) Image Acquisition Guidelines.

# Checklist: Acquisition of images for teledermatology

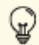

## 1. LIGHTING

- Adequate Lighting
- No shadows or glares
- Polarized and non-polarized

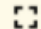

## 5. FOCUS & FIELD

- Focus on center of lesion
- Maximum focus possible

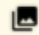

## 2. BACKGROUND

- Solid Color
- No patterns
- No jewelry

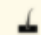

## 6. RESOLUTION

- Visualize hair follicles
- Visualize skin markings
- Visualize regression

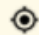

## 3. FIELD OF VIEW

- Balanced & centered
- Multiple images

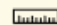

## 6. SCALE

- Appropriate Scale
- Distraction-free orientation

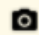

## 4. ORIENTATION

- Regional
- Anatomical Identifier
- Close-up
- Dermoscopy
